# Supplementary material for: Data Reliability in a Citizen Science Protocol for Monitoring Stingless Bees Flight Activity
Source: MDPI journal article supplement (doi:10.3390/insects12090766), 2021-08-27
Supplement: s1 [file s1]

# Supplementary Materials: Data reliability in a Citizen Science protocol for monitoring stingless bees flight activity

Jailson N. Leocadio <sup>1</sup>, Natalia P. Ghilardi-Lopes <sup>2</sup>, Sheina Koffler <sup>3</sup>, Celso Barbiéri <sup>4</sup>, Tiago M. Franco <sup>4</sup>, Bruno Albertini <sup>1</sup> and Antonio M. Saraiva <sup>1,3</sup>

**Table S1.** Dispersion of residual variance for each model. Significant dispersion models are highlighted in bold.

|             | Response | fixed-effects                | dispersion    | p-value      |
|-------------|----------|------------------------------|---------------|--------------|
| Replication | entrance | group + video quality        | 1.0036        | 0.872        |
|             |          | group                        | 1.0028        | 0.868        |
|             |          | video quality                | 1.0018        | 0.86         |
|             |          | null                         | 1.0009        | 0.86         |
|             | exit     | group + video quality        | 0.86385       | 0.388        |
|             |          | group                        | 0.86356       | 0.386        |
|             |          | video quality                | 0.86068       | 0.382        |
|             |          | null                         | 0.86445       | 0.386        |
|             | pollen   | group + video quality        | 1.0402        | 0.676        |
|             |          | group                        | 1.0409        | 0.676        |
|             |          | video quality                | 1.0435        | 0.634        |
|             |          | null                         | 1.0439        | 0.646        |
|             | entrance | group + video quality        | 0.78575       | 0.896        |
|             |          | group                        | 0.78227       | 0.916        |
|             |          | video quality                | 0.78299       | 0.906        |
|             |          | null                         | 0.78214       | 0.93         |
|             | exit     | group + video quality        | 0.48697       | 0.246        |
|             |          | group                        | 0.48786       | 0.244        |
|             |          | video quality                | 0.48752       | 0.244        |
|             |          | null                         | 0.48806       | 0.232        |
|             | pollen   | group + video quality        | 1.4515        | 0.096        |
|             |          | group                        | 1.4465        | 0.096        |
|             |          | video quality                | 1.4308        | 0.098        |
|             |          | null                         | 1.426         | 0.124        |
| Validation  | entrance | group + video quality        | 1.05          | 0.838        |
|             |          | group                        | 1.0487        | 0.838        |
|             |          | video quality                | 1.0497        | 0.846        |
|             |          | null                         | 1.0481        | 0.858        |
|             | exit     | group + video quality        | 0.94205       | 0.72         |
|             |          | group                        | 0.94207       | 0.71         |
|             |          | video quality                | 0.94665       | 0.734        |
|             |          | null                         | 0.94655       | 0.736        |
|             | pollen   | group + video quality        | 1.0359        | 0.758        |
|             |          | group                        | 1.0361        | 0.746        |
|             |          | video quality                | 1.0407        | 0.69         |
|             |          | null                         | 1.0406        | 0.712        |
|             | entrance | group + video quality        | 0.78728       | 0.934        |
|             |          | group                        | 0.78883       | 0.912        |
|             |          | video quality                | 0.79104       | 0.924        |
|             |          | null                         | 0.78844       | 0.932        |
|             | exit     | group + video quality        | 0.47746       | 0.266        |
|             |          | group                        | 0.47922       | 0.264        |
|             |          | video quality                | 0.47861       | 0.272        |
|             |          | null                         | 0.47718       | 0.262        |
|             | pollen   | <b>group + video quality</b> | <b>1.693</b>  | <b>0.034</b> |
|             |          | <b>group</b>                 | <b>1.6759</b> | <b>0.036</b> |
|             |          | <b>video quality</b>         | <b>1.7061</b> | <b>0.032</b> |
|             |          | <b>null</b>                  | <b>1.6842</b> | <b>0.03</b>  |

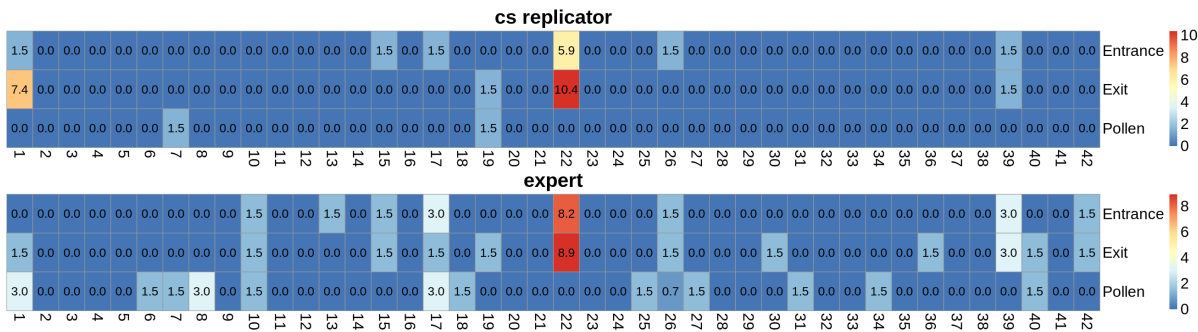

**Figure S1.** Median Absolute Deviation (MAD) value of each video for replicator citizen scientists and experts in different bee activities.
